# Supplementary material for: Exploring the Spatiotemporal Characteristics of COVID-19 Infections among Healthcare Workers: A Multi-Scale Perspective
Source: MDPI journal article supplement (doi:10.3390/ijgi10100691), 2021-10-14
Supplement: s1 [file s1]

Archive with 1 entries (1 files):
- ijgi-1365880-supplementary.pdf
